# Supplementary material for: Semantic Clustering during Verbal Episodic Memory Encoding and Retrieval in Older Adults: One Cognitive Mechanism of Superaging
Source: MDPI journal article supplement (doi:10.3390/brainsci14020171), 2024-02-08

## Supplemental Materials

Table S1. Correlations between demographic variables and variables from the production models.

|           | Sample 1 |           |                |                         |                | Sample 2 |           |                |                         |                |
|-----------|----------|-----------|----------------|-------------------------|----------------|----------|-----------|----------------|-------------------------|----------------|
|           | Age      | Education | Trial 1 Recall | Trial 5 Sem. Clustering | Trial 5 Recall | Age      | Education | Trial 1 Recall | Trial 5 Sem. Clustering | Trial 5 Recall |
| Age       |          | -0.05     | 0.04           | 0.12                    | 0.23           |          | -0.14     | -.20           | .18                     | -.05           |
| Education | -0.05    |           | 0.43**         | 0.53**                  | 0.33           | -0.14    |           | -.11           | .19                     | .13            |
| Sex       | .097     | 0.11      | 0.42**         | 0.32*                   | 0.38*          | -.01     | .01       | .18            | -.10                    | -.06           |

\*p<.05, \*\*p<.01, \*\*\*p<.001

Table S2. Correlations between demographic variables and variables from the utilization models.

|           | Sample 1 |           |             |             |                 |                 | Sample 2 |           |             |             |                 |                 |
|-----------|----------|-----------|-------------|-------------|-----------------|-----------------|----------|-----------|-------------|-------------|-----------------|-----------------|
|           | Age      | Education | SDFR Recall | LDFR Recall | SDFR Clustering | LDFR Clustering | Age      | Education | SDFR Recall | LDFR Recall | SDFR Clustering | LDFR Clustering |
| Age       | 1.00     | -0.05     | 0.01        | 0.05        | 0.12            | -0.03           | 1.00     | -0.14     |             | 0.09        | 0.18            | 0.28            |
| Education | -0.05    | 1.00      | 0.40        | 0.50*       | 0.42*           | 0.47*           | -0.14    | 1.00      |             | 0.17        | 0.11            | 0.17            |
| Sex       | .097     | 0.11      | .32*        | .40*        | .38*            | .40*            | .01      | -.01      | -.12        | -.15        | -.07            | -.09            |

\*p<.05, \*\*p<.01, \*\*\*p<.001

Table S3. Regression results for production models including demographic variables.

| Sample 1: Recall on Trial 5              |                  |                        |                | Sample 2: Recall on Trial 5              |                  |                        |                  |
|------------------------------------------|------------------|------------------------|----------------|------------------------------------------|------------------|------------------------|------------------|
| <i>Predictors</i>                        | <i>Estimates</i> | <i>Conf. Int (95%)</i> | <i>P-Value</i> | <i>Predictors</i>                        | <i>Estimates</i> | <i>Conf. Int (95%)</i> | <i>P-Value</i>   |
| Intercept                                | 6.72             | -0.85 – 14.28          | 0.080          | Intercept                                | 16.68            | 8.08 – 25.27           | <b>0.001</b>     |
| Age                                      | 0.08             | -0.04 – 0.20           | 0.167          | Age                                      | -0.11            | -0.22 – -0.00          | <b>0.042</b>     |
| Gender(F)                                | -0.39            | -1.64 – 0.86           | 0.528          | Gender(F)                                | -0.13            | -1.70 – 1.43           | 0.863            |
| Education                                | -0.18            | -0.52 – 0.16           | 0.293          | Education                                | -0.01            | -0.07 – 0.06           | 0.869            |
| Recall on Trial 1                        | 0.33             | 0.02 – 0.64            | <b>0.039</b>   | Recall on Trial 1                        | 0.26             | -0.20 – 0.72           | 0.246            |
| Clustering on Trial 5                    | 0.38             | 0.14 – 0.62            | <b>0.002</b>   | Clustering on Trial 5                    | 0.64             | 0.35 – 0.94            | <b>&lt;0.001</b> |
| Observations                             | 40               |                        |                | Observations                             | 29               |                        |                  |
| R <sup>2</sup> / R <sup>2</sup> adjusted | 0.594 / 0.534    |                        |                | R <sup>2</sup> / R <sup>2</sup> adjusted | 0.537 / 0.436    |                        |                  |

Table S4. Regression results for short-delay utilization models including demographic variables.

| Sample 1: Recall on Short-Delay Trial    |                  |                        |                  | Sample 2: Recall on Short-Delay Trial    |                  |                        |                |
|------------------------------------------|------------------|------------------------|------------------|------------------------------------------|------------------|------------------------|----------------|
| <i>Predictors</i>                        | <i>Estimates</i> | <i>Conf. Int (95%)</i> | <i>P-Value</i>   | <i>Predictors</i>                        | <i>Estimates</i> | <i>Conf. Int (95%)</i> | <i>P-Value</i> |
| Intercept                                | 6.45             | -0.35 – 13.25          | 0.062            | Intercept                                | 1.59             | -7.87 – 11.06          | 0.731          |
| Age                                      | -0.10            | -0.18 – -0.02          | <b>0.018</b>     | Age                                      | 0.02             | -0.08 – 0.12           | 0.710          |
| Gender(F)                                | 0.17             | -0.77 – 1.12           | 0.715            | Gender(F)                                | -0.00            | -0.06 – 0.06           | 0.975          |
| Education                                | 0.03             | -0.20 – 0.26           | 0.807            | Education                                | 0.22             | -1.14 – 1.57           | 0.743          |
| Recall on Trial 5                        | 0.71             | 0.46 – 0.95            | <b>&lt;0.001</b> | Recall on Trial 5                        | 0.43             | 0.06 – 0.80            | <b>0.026</b>   |
| Clustering on SDFR                       | 0.50             | 0.27 – 0.72            | <b>&lt;0.001</b> | Clustering on SDFR                       | 0.65             | 0.26 – 1.03            | <b>0.002</b>   |
| Observations                             | 40               |                        |                  | Observations                             | 29               |                        |                |
| R <sup>2</sup> / R <sup>2</sup> adjusted | 0.848 / 0.825    |                        |                  | R <sup>2</sup> / R <sup>2</sup> adjusted | 0.724 / 0.664    |                        |                |

Table S5. Regression results for long-delay utilization models including demographic variables

| Sample 1: Recall on Long-Delay Trial     |                  |                        |                  | Sample 2: Recall on Long-Delay Trial     |                  |                        |                  |
|------------------------------------------|------------------|------------------------|------------------|------------------------------------------|------------------|------------------------|------------------|
| <i>Predictors</i>                        | <i>Estimates</i> | <i>Conf. Int (95%)</i> | <i>P-Value</i>   | <i>Predictors</i>                        | <i>Estimates</i> | <i>Conf. Int (95%)</i> | <i>P-Value</i>   |
| Intercept                                | -2.72            | -9.35 – 3.92           | 0.411            | Intercept                                | 3.42             | -3.21 – 10.06          | 0.297            |
| Age                                      | 0.04             | -0.04 – 0.12           | 0.359            | Age                                      | -0.02            | -0.10 – 0.07           | 0.664            |
| Gender(F)                                | -0.42            | -1.38 – 0.54           | 0.377            | Gender(F)                                | -0.02            | -1.20 – 1.16           | 0.969            |
| Education                                | 0.19             | -0.05 – 0.43           | 0.110            | Education                                | 0.01             | -0.04 – 0.06           | 0.690            |
| Recall on SDFR                           | 0.72             | 0.50 – 0.93            | <b>&lt;0.001</b> | Recall on SDFR                           | 0.65             | 0.39 – 0.90            | <b>&lt;0.001</b> |
| Clustering on LDFR                       | 0.27             | 0.01 – 0.53            | <b>0.041</b>     | Clustering on LDFR                       | 0.41             | 0.09 – 0.72            | <b>0.014</b>     |
| Observations                             | 40               |                        |                  | Observations                             | 29               |                        |                  |
| R <sup>2</sup> / R <sup>2</sup> adjusted | 0.855 / 0.834    |                        |                  | R <sup>2</sup> / R <sup>2</sup> adjusted | 0.795 / 0.750    |                        |                  |

Figure S1. Variance Inflation Factor plots for all predictors and demographic variables from production model

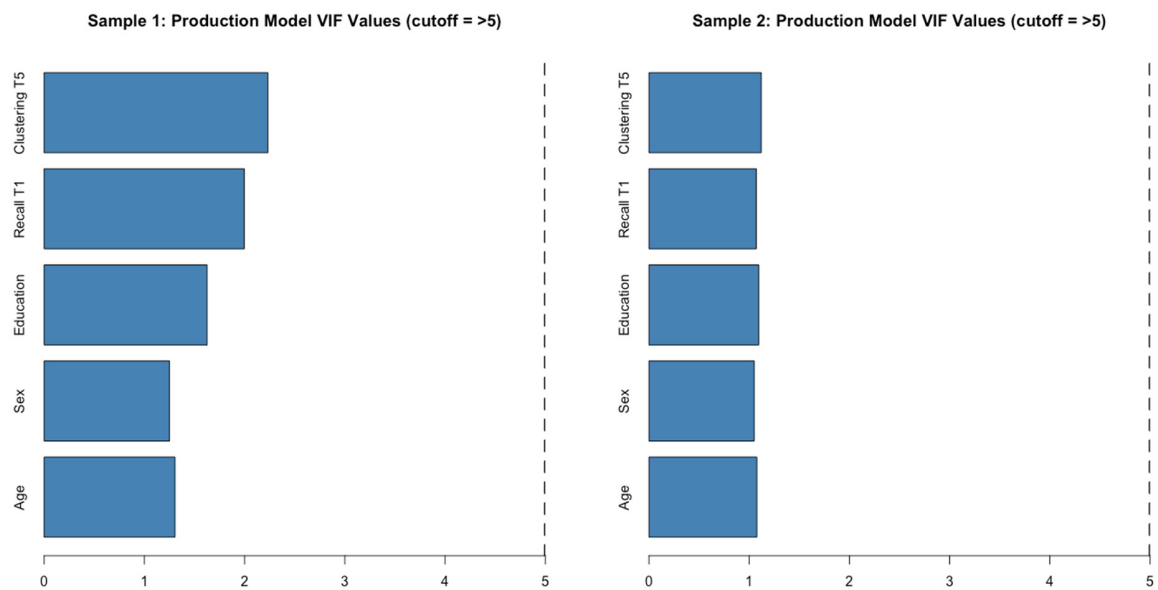

Figure S2. Variance Inflation Factor plots for all predictors and demographic variables from short-delay utilization model

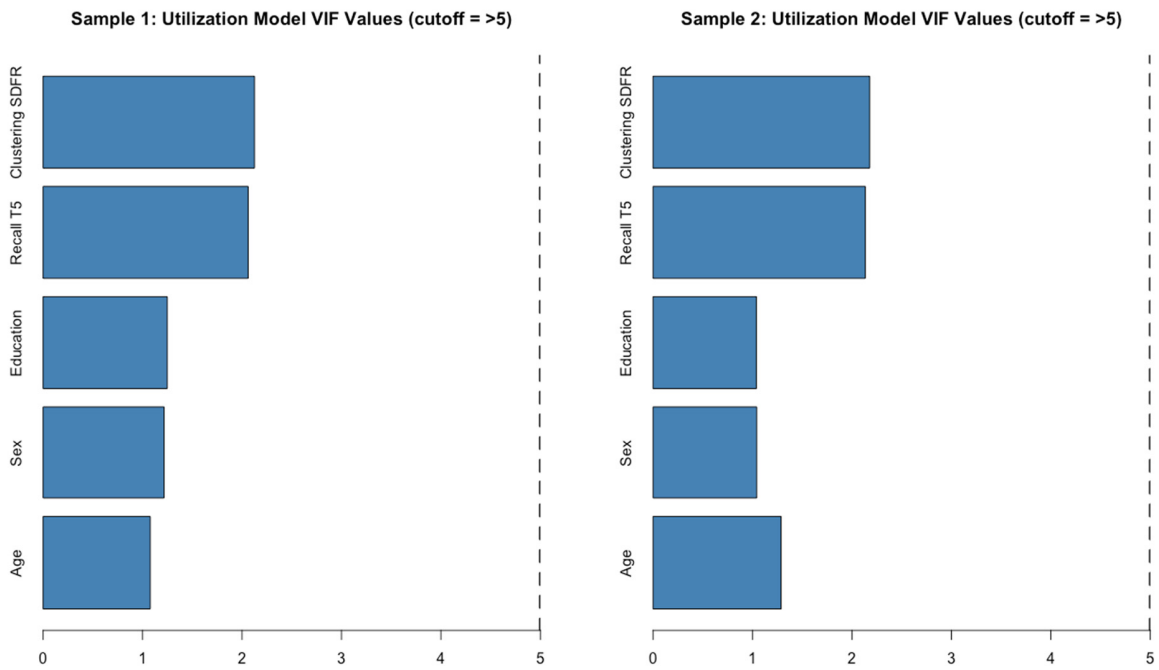

Figure S3. Variance Inflation Factor plots for all predictors and demographic variables from long-delay utilization mode

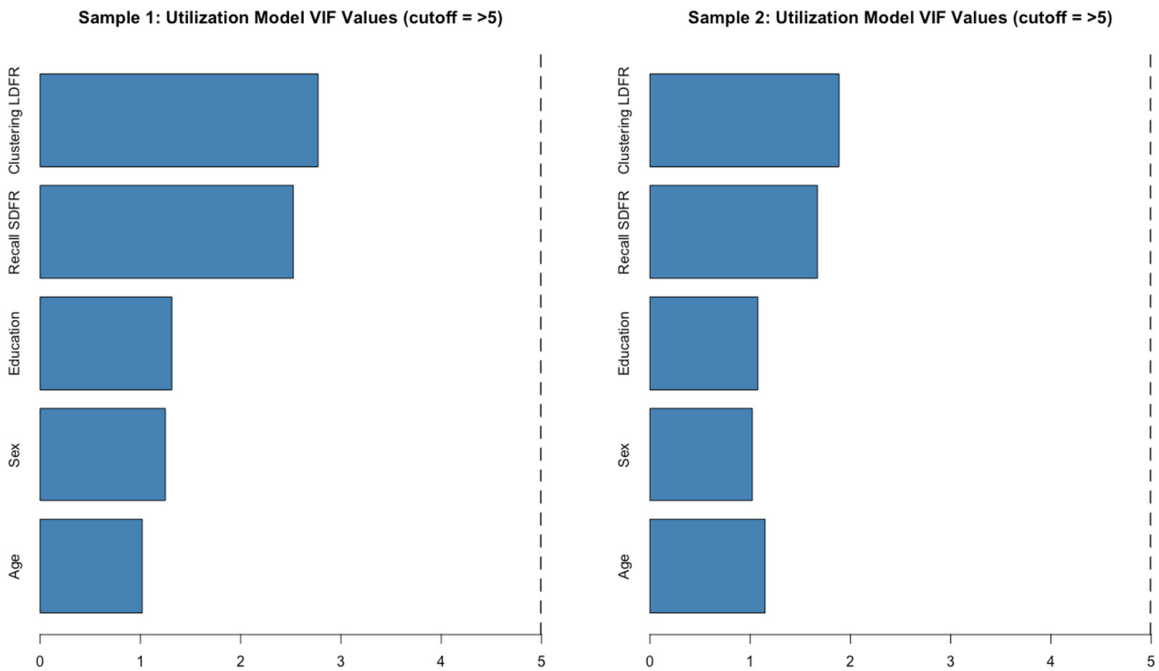

Figure S4. Summary of model R-squared values across production and utilization models.

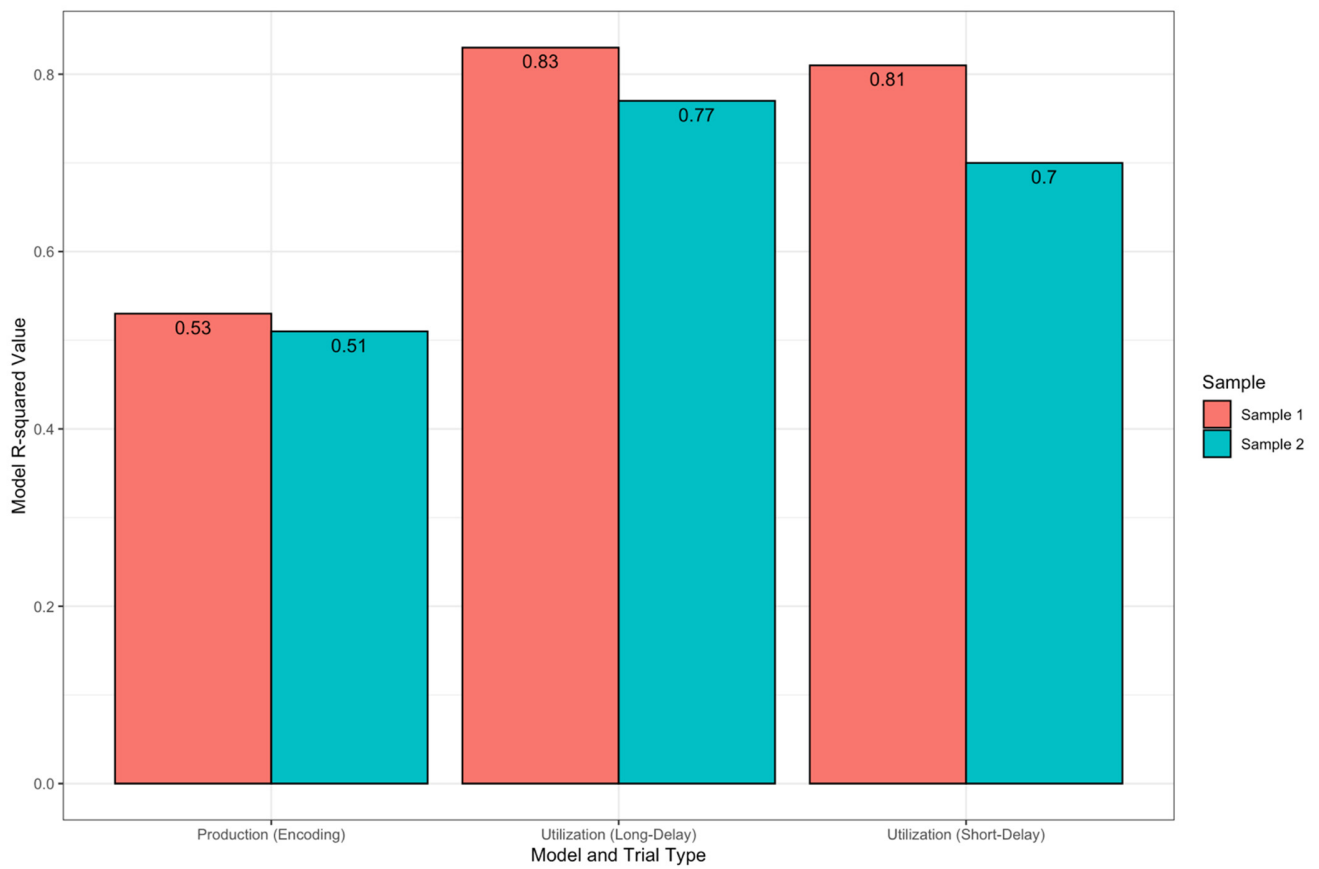

Supplement: s1 [file s1]
